# Supplementary material
Source: PubMed Central journal article supplement (PMC4286049)

**A**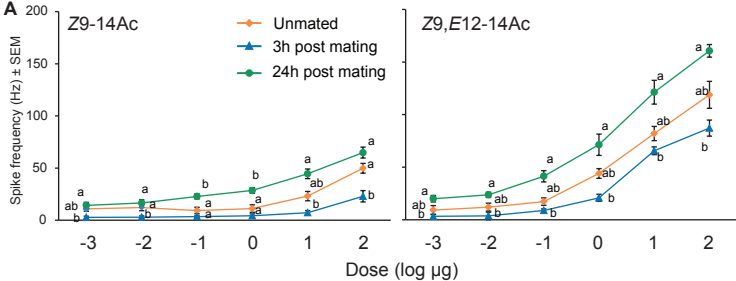

Supplement: rspb20141884supp4.pdf [file rspb20141884supp4.pdf]

**B****Unmated****3 h post mating****24 h post mating**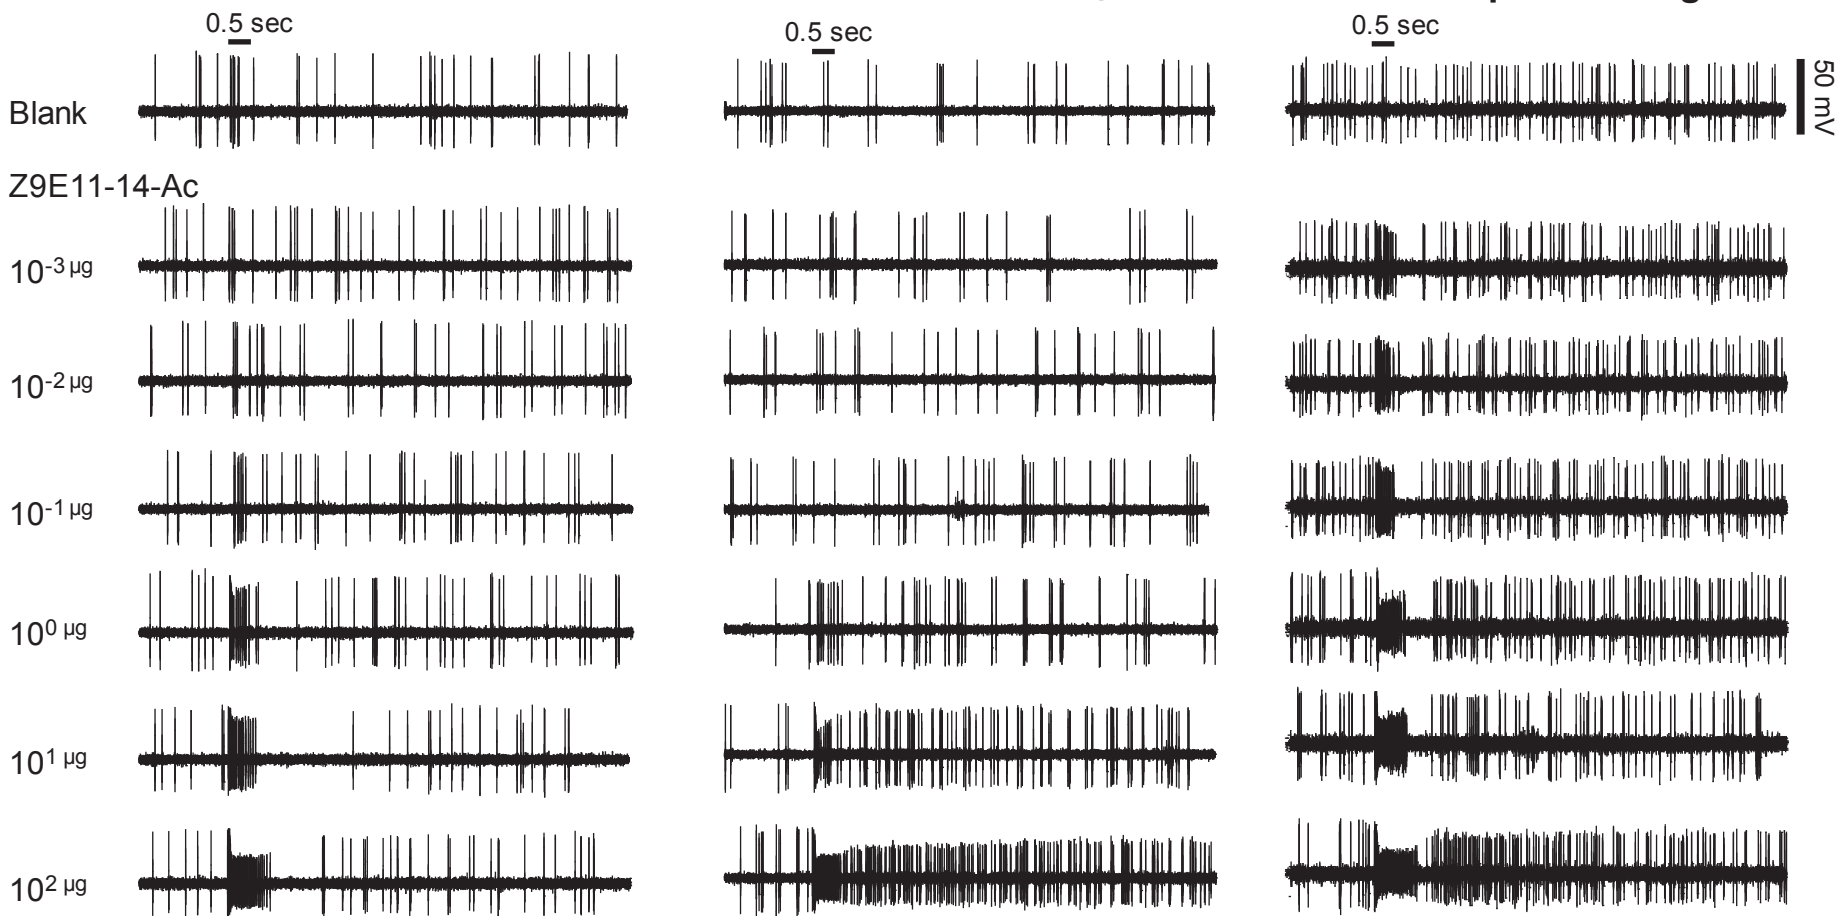

Supplement: rspb20141884supp5.pdf [file rspb20141884supp5.pdf]
